# Supplementary material for: Evidence that the Human Pathogenic Fungus Cryptococcus neoformans var. grubii May Have Evolved in Africa
Source: PLoS One. 2011 May 11;6(5):e19688. doi: 10.1371/journal.pone.0019688 (PMC3092753; doi:10.1371/journal.pone.0019688)
Supplement: Figure S3 — Ancestral recombination graphs (ARGs) of the eight MLST loci. Each ARG is rooted with serotype D sequence (H1). Blue ellipses designate the recombination nodes, and the numbers inside them indicate the SNP immediately to the left of the recombination breakpoint. The paths leading to the recombination nodes are labeled with a P (prefix) or S (suffix), indicating the 5′ and 3′ segments of the recombinant sequence, respectively. Numbers next to the branches signify the number of mutational steps between the haplotypes; the absence of a number indicates that the haplotype did not change. Ecological and geographic origins of the haplotypes are mapped on the ARGs: Green ellipses indicate an ecological niche in trees, and brown ellipses designate an ecological niche in pigeon feces. Empty green ellipses denote clinical strains endemic to Africa, and empty brown ellipses represent global clinical strains. (PDF) [file pone.0019688.s003.pdf]

# A. *GPD1*

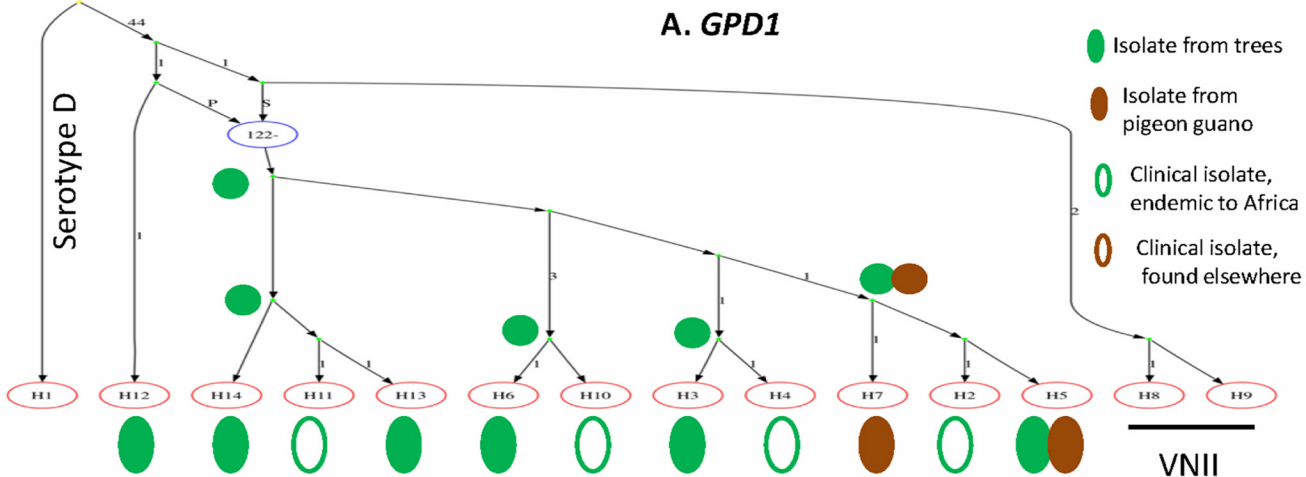

# B. *IGS1*

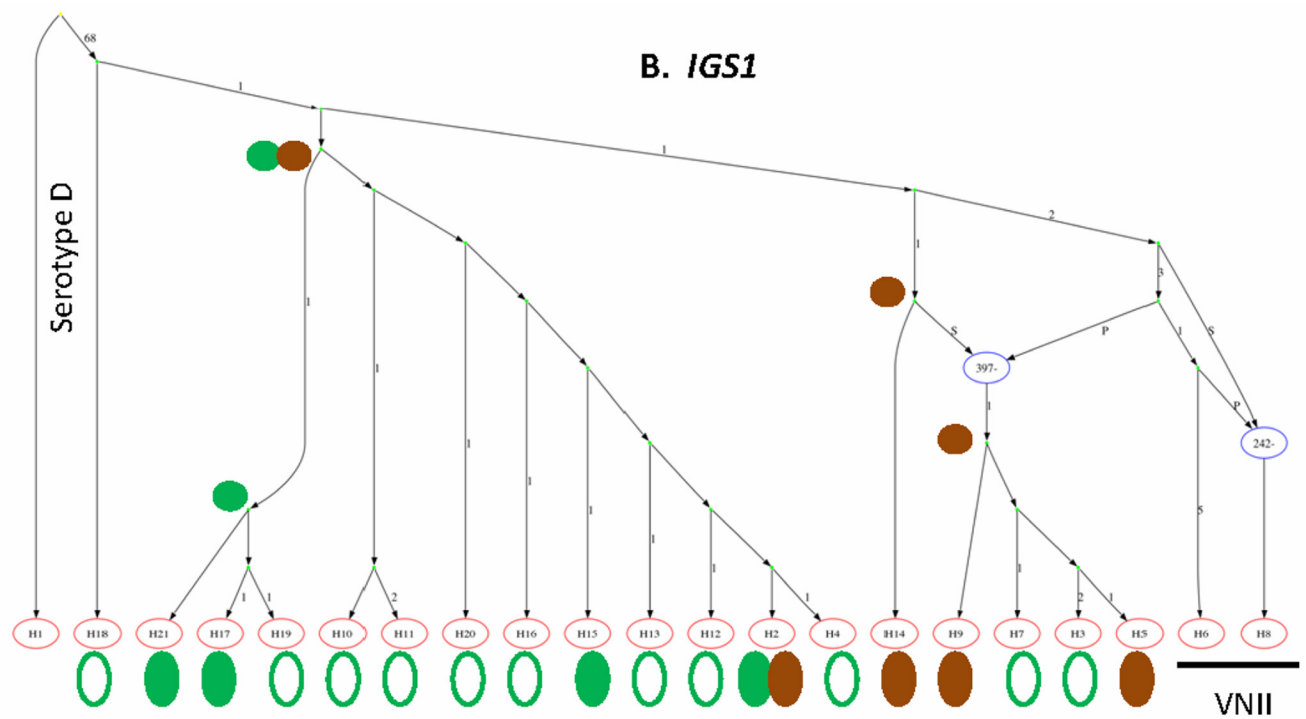

# *C. CAP59*

Serotype D

- Isolate from trees
- Isolate from pigeon guano
- Clinical isolate, endemic to Africa
- Clinical isolate, found elsewhere

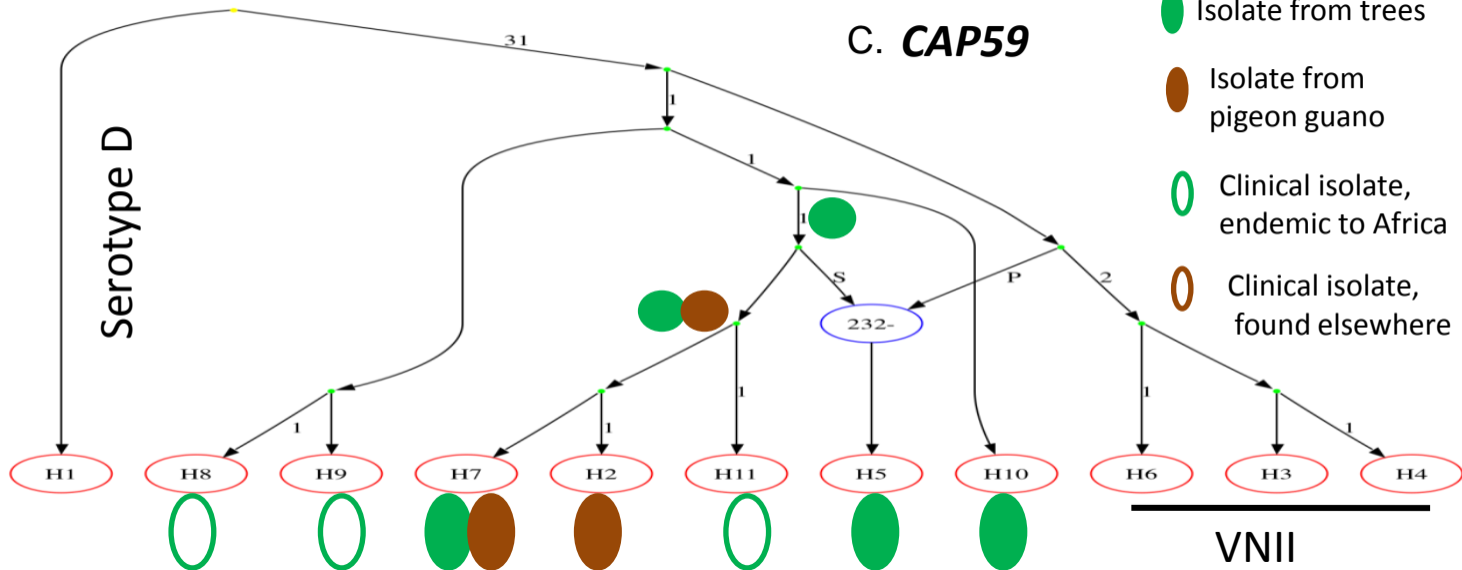



### F. *SOD1*

## Serotype D

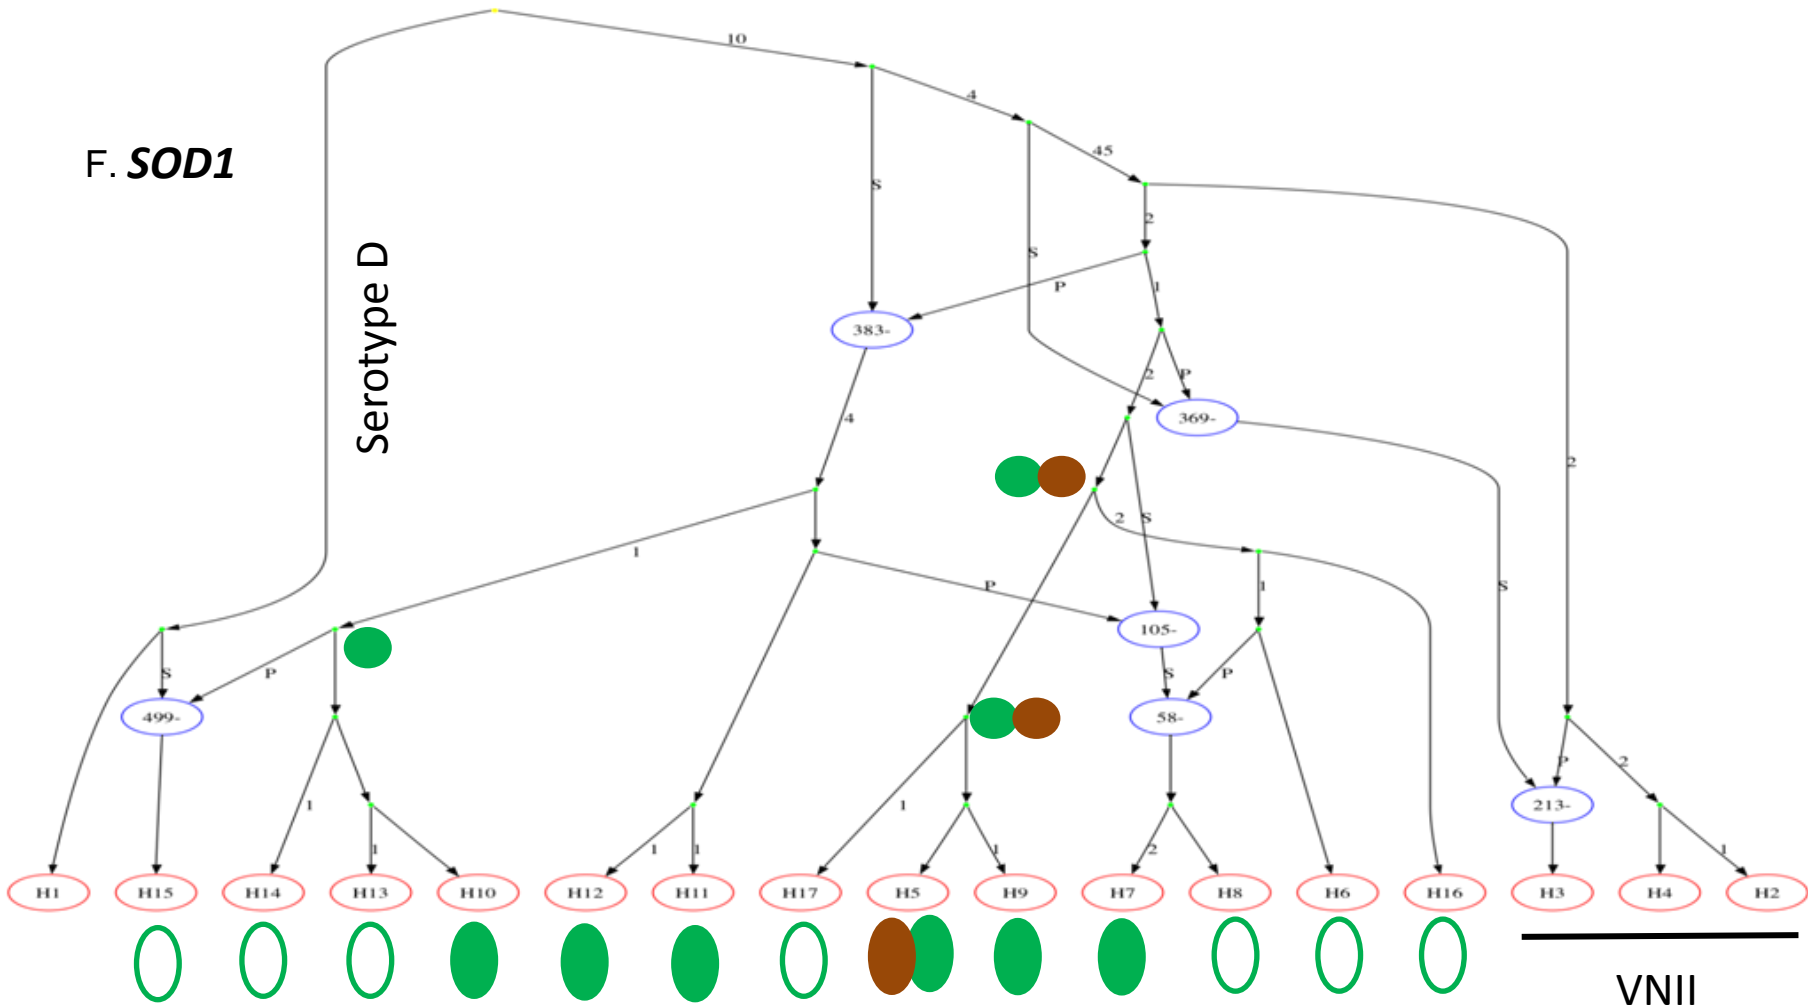

VNII

- Isolate from trees

0 Clinical isolate,  
endemic to Africa

● Isolate from pigeon guano

0 Clinical isolate,  
found elsewhere
