# Supplementary material for: Evidence that the Human Pathogenic Fungus Cryptococcus neoformans var. grubii May Have Evolved in Africa
Source: PubMed Central journal article supplement (PMC3092753; doi:10.1371/journal.pone.0019688), 2011-05-11

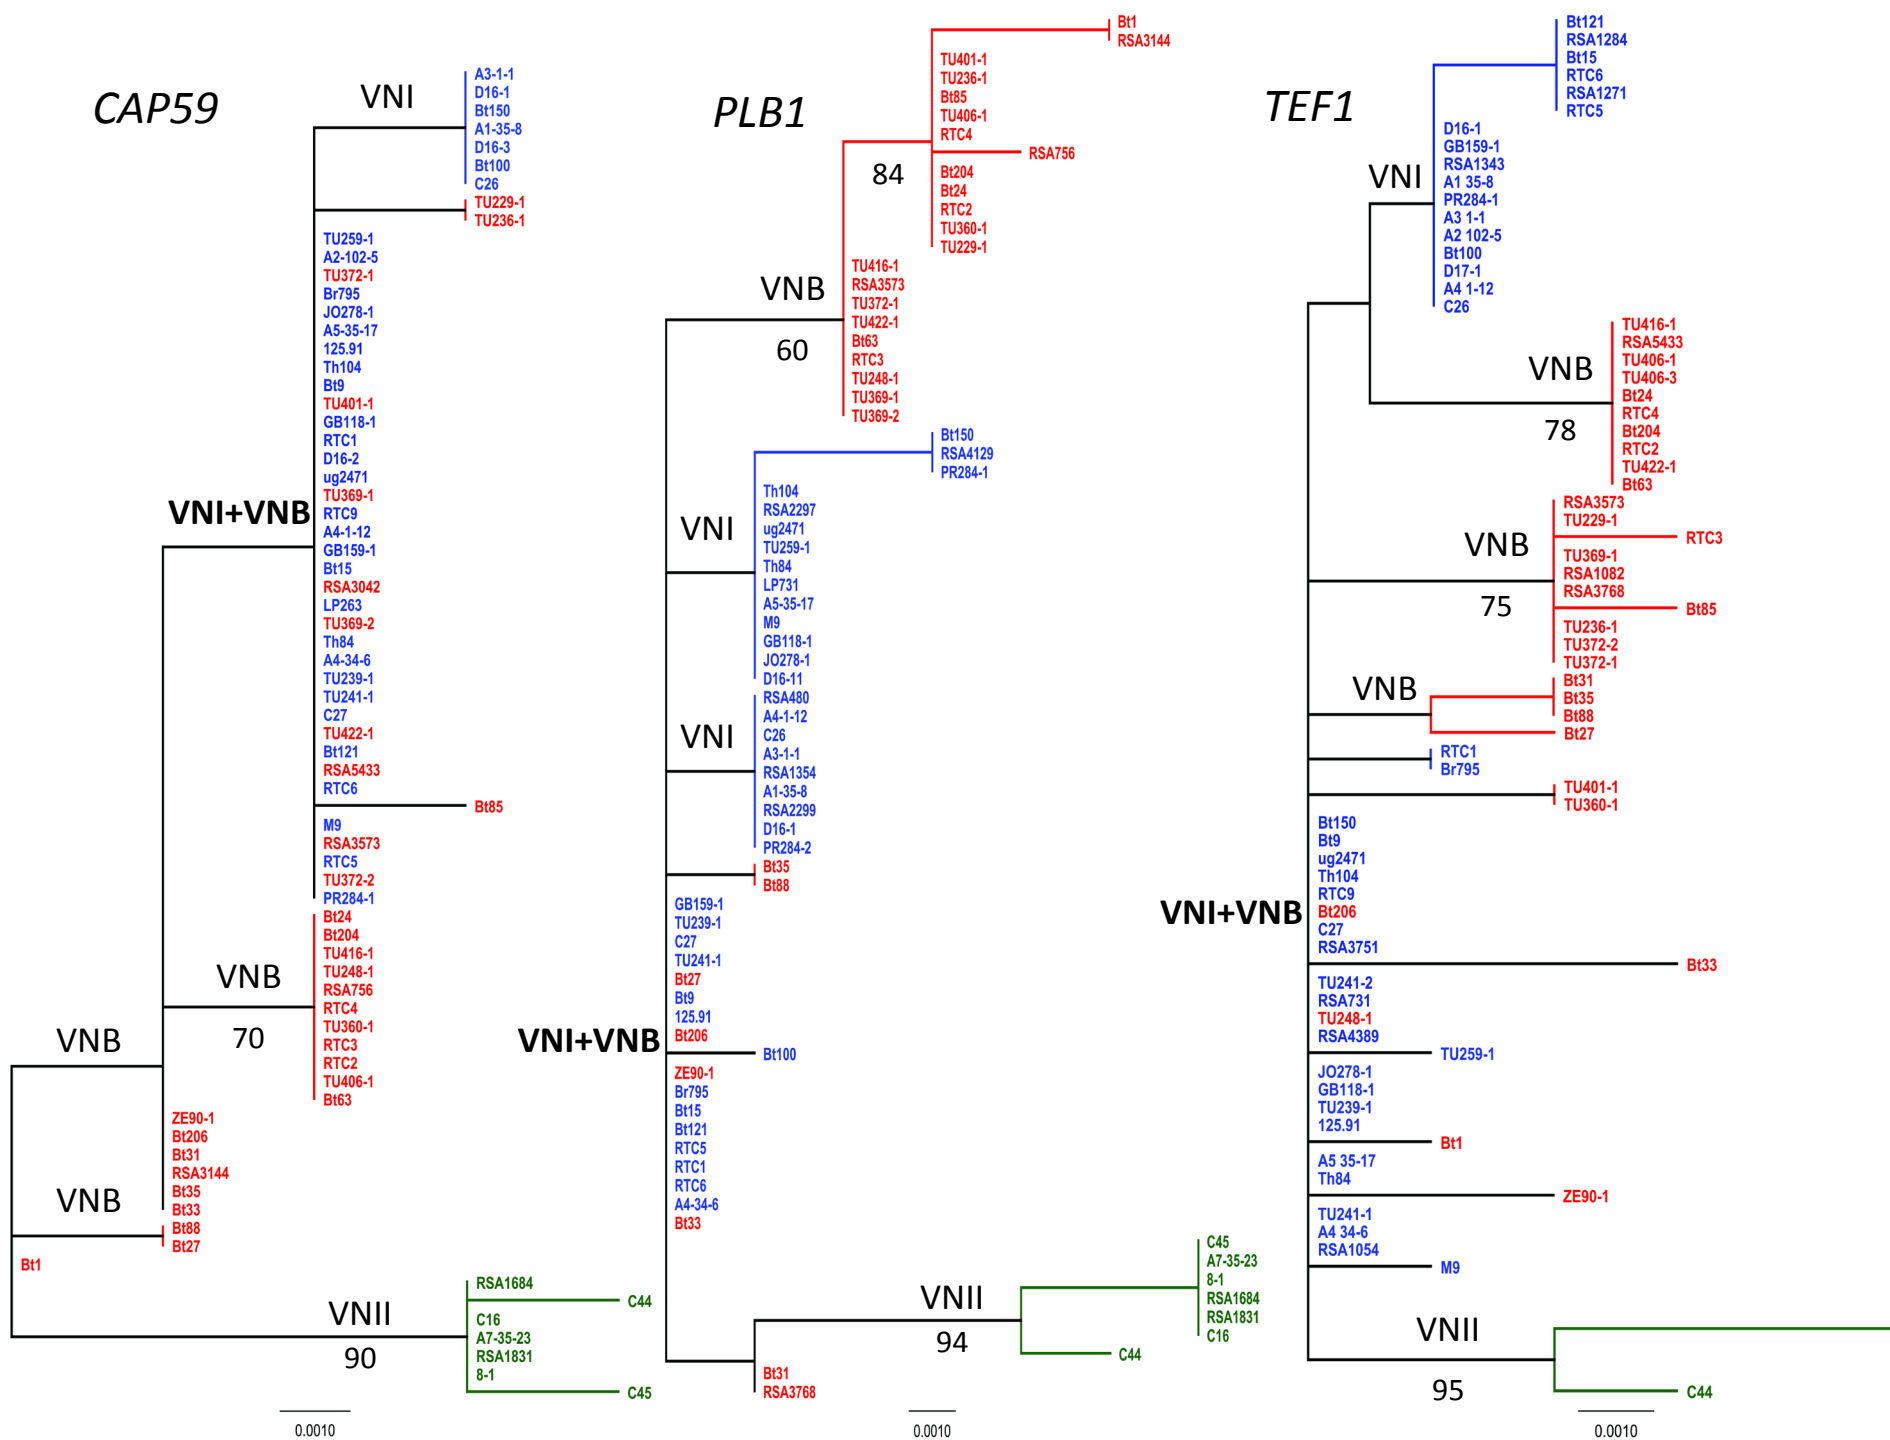

Supplement: pone.0019688.s004.pdf [file pone.0019688.s004.pdf]
