# Supplementary material for: Evidence that the Human Pathogenic Fungus Cryptococcus neoformans var. grubii May Have Evolved in Africa
Source: PubMed Central journal article supplement (PMC3092753; doi:10.1371/journal.pone.0019688), 2011-05-11
Supplement: pone.0019688.s005.pdf [file pone.0019688.s005.pdf]

**Table S1. Environmental samples yielding isolates of *Cryptococcus neoformans* var. *grubii*.**

| Site      | No. of isolates <sup>a</sup> | Location                              | Environmental source                                  |
|-----------|------------------------------|---------------------------------------|-------------------------------------------------------|
| Tu241     | 6                            | Tuli Block, Botswana                  | soil under <i>Colophospermum mopane</i> (mopane tree) |
| Tu239     | 20                           | Tuli Block, Botswana                  | <i>C. mopane</i>                                      |
| Gb159     | 10                           | Gaborone, Botswana                    | Unidentified tree                                     |
| Tu259     | 11                           | Tuli Block, Botswana                  | <i>C. mopane</i>                                      |
| Pr284     | 10                           | Free State Province, RSA <sup>b</sup> | Pigeon excreta                                        |
| Pr68      | 1                            | Free State Province, RSA              | Avian (pigeon and chicken) excreta                    |
| Gb118/RTE | 50                           | Gaborone, Botswana                    | Pigeon excreta                                        |
| Jo278     | 17                           | Johannesburg, RSA                     | Soil contaminated with avian excreta                  |
| D16       | 25                           | Durban, RSA                           | Pigeon excreta                                        |
| D17       | 15                           | Durban, RSA                           | Pigeon excreta                                        |
| Tu406     | 10                           | Tuli Block, Botswana                  | <i>C. mopane</i>                                      |
| Tu416     | 10                           | Tuli Block, Botswana                  | <i>C. mopane</i>                                      |
| Tu229     | 13                           | Tuli Block, Botswana                  | <i>C. mopane</i>                                      |
| Tu236     | 1                            | Tuli Block, Botswana                  | Soil under <i>C. mopane</i>                           |
| Tu369     | 10                           | Tuli Block, Botswana                  | <i>C. mopane</i>                                      |
| Tu372     | 9                            | Tuli Block, Botswana                  | <i>C. mopane</i>                                      |

| Site  | No. of isolates <sup>a</sup> | Location                    | Environmental source                    |
|-------|------------------------------|-----------------------------|-----------------------------------------|
| Tu401 | 10                           | Tuli Block, Botswana        | <i>C. mopane</i>                        |
| Tu248 | 2                            | Tuli Block, Botswana        | <i>Adansonia digitata</i> (Baobab tree) |
| Tu360 | 4                            | Tuli Block, Botswana        | <i>C. mopane</i>                        |
| Tu422 | 10                           | Tuli Block, Botswana        | <i>C. mopane</i>                        |
| Ze90  | 19                           | North Western Province, RSA | <i>Eucalyptus</i> sp. tree              |
| Ze93  | 10                           | North Western Province, RSA | Soil under <i>Eucalyptus</i> sp. tree   |

<sup>a</sup> Total = 273 isolates

<sup>b</sup> RSA, Republic of South Africa
