# Supplementary material for: Evidence that the Human Pathogenic Fungus Cryptococcus neoformans var. grubii May Have Evolved in Africa
Source: PubMed Central journal article supplement (PMC3092753; doi:10.1371/journal.pone.0019688), 2011-05-11
Supplement: pone.0019688.s006.pdf [file pone.0019688.s006.pdf]

**Table S2. Descriptions of the 142 strains of *Cryptococcus neoformans* var. *grubii* used in this study.**

| Strain  | Geographic origin   | Source                               | Year | Mating type | VN type | Other strains with the same genotype (countries where the genotype was isolated) <sup>a</sup> | Reference |
|---------|---------------------|--------------------------------------|------|-------------|---------|-----------------------------------------------------------------------------------------------|-----------|
| Bt1     | Botswana            | CSF <sup>b</sup> , HIV+ <sup>c</sup> | 1999 | $\alpha$    | VNB     |                                                                                               | (10)      |
| Bt27    | Botswana            | CSF, HIV+                            | 2000 | $\alpha$    | VNB     |                                                                                               | (10)      |
| Bt24    | Botswana            | CSF, HIV+                            | 2000 | <b>a</b>    | VNB     |                                                                                               | (10)      |
| Bt206   | Botswana            | CSF, HIV+                            | 2002 | <b>a</b>    | VNB     |                                                                                               | (10)      |
| Bt35    | Botswana            | CSF, HIV+                            | 2000 | $\alpha$    | VNB     |                                                                                               | (10)      |
| Bt63    | Botswana            | CSF, HIV+                            | 2000 | <b>a</b>    | VNB     |                                                                                               | (10)      |
| Bt100   | Botswana            | CSF, HIV+                            | 2001 | $\alpha$    | VNI     |                                                                                               | (10)      |
| Bt150   | Botswana            | CSF, HIV+                            | 2001 | $\alpha$    | VNI     | RSA848, RSA4321, RSA2294 (RSA)                                                                | (10)      |
| Bt121   | Botswana            | CSF, HIV+                            | 2002 | $\alpha$    | VNI     | RSA2960, RSA5084, RTC5, RTC6 (RSA)                                                            | (10)      |
| Bt15    | Botswana            | CSF, HIV+                            | 2000 | $\alpha$    | VNI     |                                                                                               | (10)      |
| Bt85    | Botswana            | CSF, HIV+                            | 2001 | <b>a</b>    | VNB     |                                                                                               | (10)      |
| Bt9     | Botswana            | CSF, HIV+                            | 1999 | $\alpha$    | VNI     |                                                                                               | (10)      |
| A1-35-8 | North Carolina, USA | pigeon excreta                       | 2002 | $\alpha$    | VNI     | C23, WM148, H99, Arg1366, Mal 120, Fr1 (Argentina, Australia, France, Malawi, USA)            | (10)      |
| C23     | North Carolina, USA | bronchial wash, HIV- <sup>c</sup>    | 2001 | $\alpha$    | VNI     | A1-35-8, WM148, H99, Arg1366, Mal 120, Fr1 (Argentina, Australia, France, Malawi, USA)        | (10)      |
| WM148   | Australia           | CSF                                  | 1995 | $\alpha$    | VNI     | C23, A1-35-8, H99, Arg1366, Mal 120, Fr1 (Argentina, Australia, France, Malawi, USA)          | (16)      |
| Br795   | Brazil              |                                      | 1998 | $\alpha$    | VNI     | RTC1, Gb118, RSA1054, Ug2471, In2629, Blg10, Tn10 (Belgium,                                   | (10)      |

| Strain   | Geographic origin   | Source           | Year | Mating type | VN type | Other strains with the same genotype                                                                                           | Reference |
|----------|---------------------|------------------|------|-------------|---------|--------------------------------------------------------------------------------------------------------------------------------|-----------|
|          |                     |                  |      |             |         | (countries where the genotype was isolated) <sup>a</sup>                                                                       |           |
|          |                     |                  |      |             |         | Botswana, Brazil, India, Tanzania, RSA, Uganda)                                                                                |           |
| H99      | North Carolina, USA | Clinical         |      | $\alpha$    | VNI     | C23, WM148, Arg1366, Mal 120, Fr1 (Argentina, Australia, France, Malawi, USA)                                                  | (16)      |
| A5-35-17 | North Carolina, USA | pigeon excreta   | 2002 | $\alpha$    | VNI     | D16-11, C8, Jo278, Jp1086, Mal 212, Bt134, It743, CHC30, Blg7 (Belgium, Botswana, China, Italy, Japan, Malawi, RSA, USA)       | (10, 38)  |
| C8       | North Carolina, USA | CSF, HIV+        | 2001 | $\alpha$    | VNI     | D16-11, A5-35-17, Jo278, Jp1086, Mal 212, Bt134, It743, CHC30, Blg7 (Belgium, Botswana, China, Italy, Japan, Malawi, RSA, USA) | (10, 38)  |
| A2-102-5 | Texas, USA          | pigeon excreta   | 2003 | $\alpha$    | VNI     | D17-1, D17-4, D16-10 (RSA)                                                                                                     | (10)      |
| A3-1-1   | North Carolina, USA | pigeon excreta   | 2002 | $\alpha$    | VNI     | D16-1, RSA1842, RSA2299, Pr284-2, Pr68, It754, Blg12, Fr5 Ug2459 (Belgium, France, Italy, RSA, Uganda)                         | (10)      |
| A4-1-12  | North Carolina, USA | pigeon excreta   | 2002 | $\alpha$    | VNI     | Fr4 (France)                                                                                                                   | (10)      |
| M9       | Malawi              | CSF, blood, HIV+ |      | $\alpha$    | VNI     | In2637 (India)                                                                                                                 | (10)      |
| Ug2471   | Uganda              | CSF, HIV+        | 2001 | $\alpha$    | VNI     | RTC1, Gb118, RSA1054, In2629, Blg10, Tn10, Br795 (Belgium, Botswana, Brazil, India, Tanzania, RSA)                             | (10)      |
| Th84     | Thailand            | blood, HIV+      | 1997 | $\alpha$    | VNI     | Ug2463 (Uganda)                                                                                                                | (10)      |
| Th104    | Thailand            | blood, HIV+      | 1997 | $\alpha$    | VNI     | RSA2297, Mal 104, Tn148 (Malawi, RSA, Thailand, Tanzania)                                                                      | (10)      |
| 125.91   | Tanzania            | CSF, HIV+        |      | <b>a</b>    | VNI     |                                                                                                                                | (11, 41)  |
| C26      | North Carolina, USA | Blood, HIV+      | 2001 | $\alpha$    | VNI     |                                                                                                                                | (10)      |

| Strain   | Geographic origin              | Source                  | Year | Mating type | VN type | Other strains with the same genotype                                                                                  | Reference  |
|----------|--------------------------------|-------------------------|------|-------------|---------|-----------------------------------------------------------------------------------------------------------------------|------------|
|          |                                |                         |      |             |         | (countries where the genotype was isolated) <sup>a</sup>                                                              |            |
| C27      | North Carolina, USA            | CSF, cancer             | 2001 | $\alpha$    | VNI     | In2632, Za1345, RSA1105 (DRC <sup>d</sup> , India, RSA)                                                               | (10)       |
| A4-34-6  | North Carolina, USA            | pigeon excreta          | 2003 | $\alpha$    | VNI     |                                                                                                                       | (10)       |
| 8-1      | North Carolina, USA            | Organ transplant        |      | $\alpha$    | VNII    |                                                                                                                       | (14)       |
| C16      | North Carolina, USA            | sputum, HIV-            | 2001 | $\alpha$    | VNII    |                                                                                                                       | (10)       |
| C2       | North Carolina, USA            | bronchial wash,<br>HIV- | 2002 | $\alpha$    | VNII    |                                                                                                                       | (10)       |
| C44      | North Carolina, USA            | CSF, HIV-               | 2002 | $\alpha$    | VNII    |                                                                                                                       | (10)       |
| A7-35-23 | North Carolina, USA            | pigeon excreta          | 2003 | $\alpha$    | VNII    |                                                                                                                       | (10)       |
| C45      | North Carolina, USA            | sputum, HIV-            | 2001 | $\alpha$    | VNII    |                                                                                                                       | (10)       |
| WM626    | Australia                      | CSF                     | 1995 | $\alpha$    | VNII    |                                                                                                                       | (16)       |
| RSA1684  | Limpopo Pr., RSA <sup>d</sup>  | Clinical                | 2006 | $\alpha$    | VNII    | RSA1831 (RSA)                                                                                                         | This study |
| RSA1831  | Limpopo Pr., RSA               | Clinical                | 2006 | $\alpha$    | VNII    | RSA1684 (RSA)                                                                                                         | This study |
| RSA1054  | Limpopo Pr., RSA               | Clinical                | 2006 | $\alpha$    | VNI     | RTC9, Gb118, RTE-ALL, Ug2471, In2629, Blg10, Tn10, Br795<br>(Belgium, Botswana, Brazil, India, Tanzania, RSA, Uganda) | This study |
| RSA1105  | Limpopo Pr., RSA               | Clinical                | 2006 | $\alpha$    | VNI     | C27, In2632, Za1345 (DRC, India, RSA)                                                                                 | This study |
| RSA1271  | Limpopo Pr. <sup>d</sup> , RSA | Clinical                | 2006 | $\alpha$    | VNI     | RSA1442, RSA3796 (RSA)                                                                                                | This study |
| RSA1284  | Limpopo Pr., RSA               | Clinical                | 2006 | $\alpha$    | VNI     |                                                                                                                       | This study |
| RSA1332  | Limpopo Pr., RSA               | Clinical                | 2006 | $\alpha$    | VNI     |                                                                                                                       | This study |
| RSA1354  | Limpopo Pr., RSA               | Clinical                | 2006 | $\alpha$    | VNI     |                                                                                                                       | This study |
| RSA1442  | Limpopo Pr., RSA               | Clinical                | 2006 | $\alpha$    | VNI     | RSA1271, RSA3796 (RSA)                                                                                                | This study |

| Strain  | Geographic origin | Source   | Year | Mating type | VN type | Other strains with the same genotype                                                                                          |  | Reference  |
|---------|-------------------|----------|------|-------------|---------|-------------------------------------------------------------------------------------------------------------------------------|--|------------|
|         |                   |          |      |             |         | (countries where the genotype was isolated) <sup>a</sup>                                                                      |  |            |
| RSA1691 | Limpopo Pr., RSA  | Clinical | 2006 | $\alpha$    | VNI     |                                                                                                                               |  | This study |
| RSA1842 | Limpopo Pr., RSA  | Clinical | 2006 | $\alpha$    | VNI     | A3-1-1, D16-1, RSA2299, RSA480, Pr284-2, Pr68-1, It754, Blg12, Fr5 (Belgium, France, Italy, RSA, Uganda, USA)                 |  | This study |
| RSA2297 | Limpopo Pr., RSA  | Clinical | 2006 | $\alpha$    | VNI     | Th104, Mal 104, Tn148 (Malawi, RSA, Tanzania, Thailand)                                                                       |  | This study |
| RSA2299 | Limpopo Pr., RSA  | Clinical | 2006 | $\alpha$    | VNI     | A3-1-1, D16-1, RSA1842, RSA480, Pr284-2, Pr68-1, It754, Blg12, Fr5 (Belgium, France, Italy, RSA, Uganda, USA)                 |  | This study |
| RSA263  | Limpopo Pr., RSA  | Clinical | 2006 | $\alpha$    | VNI     |                                                                                                                               |  | This study |
| RSA2960 | Limpopo Pr., RSA  | Clinical | 2006 | $\alpha$    | VNI     | Bt121, RSA5084, RTC5, RTC6 (Botswana, RSA)                                                                                    |  | This study |
| RSA3751 | Limpopo Pr., RSA  | Clinical | 2006 | $\alpha$    | VNI     |                                                                                                                               |  | This study |
| RSA3796 | Limpopo Pr., RSA  | Clinical | 2006 | $\alpha$    | VNI     | RSA1271, RSA1442 (RSA)                                                                                                        |  | This study |
| RSA4068 | Limpopo Pr., RSA  | Clinical | 2006 | $\alpha$    | VNI     |                                                                                                                               |  | This study |
| RSA4389 | Limpopo Pr., RSA  | Clinical | 2006 | $\alpha$    | VNI     |                                                                                                                               |  | This study |
| RSA480  | Limpopo Pr., RSA  | Clinical | 2006 | $\alpha$    | VNI     | A3-1-1, D16-1, RSA1842, RSA2299, Pr284-2, Pr68-1, It754, Blg12, Fr5 (Belgium, France, Italy, RSA, Uganda, USA)                |  | This study |
| RSA5084 | Limpopo Pr., RSA  | Clinical | 2006 | $\alpha$    | VNI     | Bt121, RSA2960, RTC5, RTC6 (Botswana, RSA)                                                                                    |  | This study |
| RSA730  | Limpopo Pr., RSA  | Clinical | 2006 | $\alpha$    | VNI     | A5-35-17, C8, D16-11, Jo278-1, Jp1086, Mal 212, It743, CHC30, Blg7 (Belgium, Botswana, China, Italy, Japan, Malawi, RSA, USA) |  | This study |
| RSA731  | Limpopo Pr., RSA  | Clinical | 2006 | $\alpha$    | VNI     | A5-35-17, C8, D16-11, Jo278-1, Jp1086, Mal 212, It743, CHC30, Blg7 (Belgium, Botswana, China, Italy, Japan, Malawi, RSA, USA) |  | This study |
| RSA1343 | Limpopo Pr., RSA  | Clinical | 2006 | $\alpha$    | VNI     |                                                                                                                               |  | This study |

| Strain  | Geographic origin | Source   | Year | Mating type | VN type | Other strains with the same genotype                                                                                |  | Reference  |
|---------|-------------------|----------|------|-------------|---------|---------------------------------------------------------------------------------------------------------------------|--|------------|
|         |                   |          |      |             |         | (countries where the genotype was isolated) <sup>a</sup>                                                            |  |            |
| RSA3042 | Limpopo Pr., RSA  | Clinical | 2006 | $\alpha$    | VNI     |                                                                                                                     |  | This study |
| RSA4129 | Limpopo Pr., RSA  | Clinical | 2006 | $\alpha$    | VNI     |                                                                                                                     |  | This study |
| RSA1082 | Limpopo Pr., RSA  | Clinical | 2006 | $\alpha$    | VNB     |                                                                                                                     |  | This study |
| RSA6618 | Limpopo Pr., RSA  | Clinical | 2006 | $\alpha$    | VNB     |                                                                                                                     |  | This study |
| RSA3768 | Limpopo Pr., RSA  | Clinical | 2006 | <b>a</b>    | VNB     |                                                                                                                     |  | This study |
| RSA116  | Limpopo Pr., RSA  | Clinical | 2006 | $\alpha$    | VNI     |                                                                                                                     |  | This study |
| RSA209  | Limpopo Pr., RSA  | Clinical | 2006 | $\alpha$    | VNI     |                                                                                                                     |  | This study |
| RSA2294 | Limpopo Pr., RSA  | Clinical | 2006 | $\alpha$    | VNI     | Bt150, RSA848, RSA4321 (Botswana, RSA)                                                                              |  | This study |
| RSA4321 | Limpopo Pr., RSA  | Clinical | 2006 | $\alpha$    | VNI     | Bt150, RSA848, RSA2294 (Botswana, RSA)                                                                              |  | This study |
| RSA848  | Limpopo Pr., RSA  | Clinical | 2006 | $\alpha$    | VNI     | Bt150, RSA2294, RSA4321 (Botswana, RSA)                                                                             |  | This study |
| RSA2296 | Limpopo Pr., RSA  | Clinical | 2006 | $\alpha$    | VNI     |                                                                                                                     |  | This study |
| RSA314  | Limpopo Pr., RSA  | Clinical | 2006 | $\alpha$    | VNI     |                                                                                                                     |  | This study |
| RSA3573 | Limpopo Pr., RSA  | Clinical | 2006 | $\alpha$    | VNB     |                                                                                                                     |  | This study |
| RSA5433 | Limpopo Pr., RSA  | Clinical | 2006 | $\alpha$    | VNB     |                                                                                                                     |  | This study |
| RSA756  | Limpopo Pr., RSA  | Clinical | 2006 | $\alpha$    | VNB     |                                                                                                                     |  | This study |
| RSA3144 | Limpopo Pr., RSA  | Clinical | 2006 | $\alpha$    | VNB     |                                                                                                                     |  | This study |
| RTC1    | Botswana          | Clinical | 2007 | $\alpha$    | VNI     | Br795, Ug2458, Gb118, Blg10, Tn10, Bt, In2629, RSA1054<br>(Belgium, Botswana, Brazil, India, RSA, Tanzania, Uganda) |  | This study |
| RTC2    | Botswana          | Clinical | 2007 | $\alpha$    | VNB     | RTC4 (Botswana)                                                                                                     |  | This study |
| RTC3    | Botswana          | Clinical | 2007 | $\alpha$    | VNB     |                                                                                                                     |  | This study |

| Strain | Geographic origin | Source         | Year | Mating type | VN type | Other strains with the same genotype                                                                                       | Reference  |
|--------|-------------------|----------------|------|-------------|---------|----------------------------------------------------------------------------------------------------------------------------|------------|
|        |                   |                |      |             |         | (countries where the genotype was isolated) <sup>a</sup>                                                                   |            |
| RTC4   | Botswana          | Clinical       | 2007 | $\alpha$    | VNB     | RTC2 (Botswana)                                                                                                            | This study |
| RTC5   | Botswana          | Clinical       | 2007 | $\alpha$    | VNI     | Bt121, RSA2960, RSA5084, RTC6 (Botswana, RSA)                                                                              | This study |
| RTC6   | Botswana          | Clinical       | 2007 | $\alpha$    | VNI     | Bt121, RSA2960, RSA5084, RTC5 (Botswana, RSA)                                                                              | This study |
| RTC9   | Botswana          | Clinical       | 2007 | $\alpha$    | VNI     | RSA1054, Gb118, RTE-ALL, Ug2471, In2629, Blg10, Tn10, Br795 (Belgium, Botswana, Brazil, India, Tanzania, RSA, Uganda)      | This study |
| D16-1  | Durban, RSA       | pigeon excreta | 2007 | $\alpha$    | VNI     | A3-1-1, D16-1, RSA2299, RSA480, Pr284-2, Pr68-1, It754, Blg12, Fr5 (Belgium, France, Italy, RSA, USA)                      | This study |
| D16-2  | Durban, RSA       | pigeon excreta | 2007 | $\alpha$    | VNI     | D16-4, D16-16, D16-7, D17-2, D17-5, D17-7 (RSA)                                                                            | This study |
| D16-3  | Durban, RSA       | pigeon excreta | 2007 | $\alpha$    | VNI     | A3-1-1, D16-14, D16-1, RSA2299, RSA480, Pr284-2, Pr68-1, It754, Blg12, Fr5 (Belgium, France, Italy, RSA, USA)              | This study |
| D16-4  | Durban, RSA       | pigeon excreta | 2007 | $\alpha$    | VNI     | D16-2, D16-16, D16-7, D17-2, D17-5, D17-7 (RSA)                                                                            | This study |
| D16-5  | Durban, RSA       | pigeon excreta | 2007 | $\alpha$    | VNI     |                                                                                                                            | This study |
| D16-6  | Durban, RSA       | pigeon excreta | 2007 | $\alpha$    | VNI     | A5-35-17, C8, Jo278, Jp1086, Mal 212, Bt134, It743, Blg7, CHC30 (Belgium, Botswana, China, Italy, Japan, Malawi, RSA, USA) | This study |
| D16-7  | Durban, RSA       | pigeon excreta | 2007 | $\alpha$    | VNI     | D16-2, D16-16, D16-4, D17-2, D17-5, D17-7 (RSA)                                                                            | This study |
| D16-9  | Durban, RSA       | pigeon excreta | 2007 | $\alpha$    | VNI     | A5-35-17, C8, Jo278, Jp1086, Mal 212, Bt134, It743, CHC30, Blg7 (Belgium, Botswana, China, Italy, Japan, Malawi, RSA, USA) | This study |
| D16-10 | Durban, RSA       | pigeon excreta | 2007 | $\alpha$    | VNI     | A2-102-5, D17-1, D17-4 (RSA, USA)                                                                                          | This study |
| D16-11 | Durban, RSA       | pigeon excreta | 2007 | $\alpha$    | VNI     | A5-35-17, C8, Jo278, Jp1086, Mal 212, Bt134, It743, Blg7, CHC30 (Belgium, Botswana, China, Italy, Japan, Malawi, RSA, USA) | This study |

| Strain  | Geographic origin  | Source                  | Year | Mating type | VN type | Other strains with the same genotype                                                                                          | Reference  |
|---------|--------------------|-------------------------|------|-------------|---------|-------------------------------------------------------------------------------------------------------------------------------|------------|
|         |                    |                         |      |             |         | (countries where the genotype was isolated) <sup>a</sup>                                                                      |            |
| D16-12  | Durban, RSA        | pigeon excreta          | 2007 | $\alpha$    | VNI     | A5-35-17, C8, Jo278, Jp1086, Mal 212, Bt134, It743, Blg7, CHC30<br>(Belgium, Botswana, China, Italy, Japan, Malawi, RSA, USA) | This study |
| D16-13  | Durban, RSA        | pigeon excreta          | 2007 | $\alpha$    | VNI     | A5-35-17, C8, Jo278, Jp1086, Mal 212, Bt134, It743, Blg7, CHC30<br>(Belgium, Botswana, China, Italy, Japan, Malawi, RSA, USA) | This study |
| D16-14  | Durban, RSA        | pigeon excreta          | 2007 | $\alpha$    | VNI     | A3-1-1, D16-1, RSA2299, RSA480, Pr284-2, Pr68, it754, Blg12<br>(Belgium France, Italy, RSA, Uganda, USA)                      | This study |
| D16-16  | Durban, RSA        | pigeon excreta          | 2007 | $\alpha$    | VNI     | D16-2, D16-4, D16-7, D17-2, D17-5, D17-7 (RSA)                                                                                | This study |
| D17-1   | Durban, RSA        | pigeon excreta          | 2007 | $\alpha$    | VNI     | A2-102-5, D16-10, D17-4 (RSA, USA)                                                                                            | This study |
| D17-2   | Durban, RSA        | pigeon excreta          | 2007 | $\alpha$    | VNI     | D16-2, D16-16, D16-7, D17-4, D17-5, D17-7 (RSA)                                                                               | This study |
| D17-3   | Durban, RSA        | pigeon excreta          | 2007 | $\alpha$    | VNI     | A5-35-17, C8, Jo278, Jp1086, Mal 212, Bt134, It743, Blg7, CHC30<br>(Belgium, Botswana, China, Italy, Japan, Malawi, RSA, USA) | This study |
| D17-4   | Durban, RSA        | pigeon excreta          | 2007 | $\alpha$    | VNI     | A2-102-5, D16-10, D17-1 (RSA, USA)                                                                                            | This study |
| D17-5   | Durban, RSA        | pigeon excreta          | 2007 | $\alpha$    | VNI     | D16-2, D16-16, D16-7, D17-4, D17-5, D17-2, D17-7 (RSA)                                                                        | This study |
| D17-7   | Durban, RSA        | pigeon excreta          | 2007 | $\alpha$    | VNI     | D16-2, D16-16, D16-7, D17-4, D17-5, D17-2, D17-7 (RSA)                                                                        | This study |
| Gb118-1 | Gaborone, Botswana | pigeon excreta          | 2007 | $\alpha$    | VNI     | RSA1054, RTC9, RTE-ALL, Ug2471, In2629, Blg10, Br795, Tn10<br>(Belgium, Botswana, Brazil, India, Tanzania, RSA, Uganda)       | This study |
| Gb118-2 | Gaborone, Botswana | pigeon excreta          | 2007 | $\alpha$    | VNI     | RSA1054, RTC9, RTE-ALL, Ug2471, In2629, Blg10, Br795, Tn10<br>(Belgium, Botswana, Brazil, India, Tanzania, RSA, Uganda)       | This study |
| Gb159-1 | Gaborone, Botswana | bark, unidentified tree | 2007 | $\alpha$    | VNI     | Gb159-2 (Botswana)                                                                                                            | This study |

| Strain  | Geographic origin    | Source                               | Year | Mating type | VN type | Other strains with the same genotype                                                                                  | Reference  |
|---------|----------------------|--------------------------------------|------|-------------|---------|-----------------------------------------------------------------------------------------------------------------------|------------|
|         |                      |                                      |      |             |         | (countries where the genotype was isolated) <sup>a</sup>                                                              |            |
| Gb159-2 | Gaborone, Botswana   | bark, unidentified tree              | 2007 | $\alpha$    | VNI     | Gb159-1 (Botswana)                                                                                                    | This study |
| Jo278-1 | Johannesburg, RSA    | soil contaminated with avian excreta | 2007 | $\alpha$    | VNI     | A5-35-17, C8, Jp1086, Mal 212, Bt134, It743, CHC30, Jo278-2 (Belgium Botswana, China, Italy, Japan, Malawi, RSA, USA) | This study |
| Jo278-2 | Johannesburg, RSA    | soil contaminated with avian excreta | 2007 | $\alpha$    | VNI     | A5-35-17, C8, Jp1086, Mal 212, Bt134, It743, CHC30, Jo278-1 (Belgium Botswana, China, Italy, Japan, Malawi, RSA, USA) | This study |
| Pr68-1  | Parys, RSA           | pigeon excreta                       | 2007 | $\alpha$    | VNI     | A3-1-1, D16-1, RSA2299, RSA480, Pr284-2, It754, Blg12, Fr5 (Belgium, France, Italy, RSA, Uganda, USA)                 | This study |
| Pr284-1 | Parys, RSA           | pigeon excreta                       | 2007 | $\alpha$    | VNI     |                                                                                                                       | This study |
| Pr284-2 | Parys, RSA           | pigeon excreta                       | 2007 | $\alpha$    | VNI     | A3-1-1, D16-1, RSA2299, RSA480, Pr68-1, It754, Blg12, Fr5 (Belgium, France, Italy, RSA, Uganda, USA)                  | This study |
| RTE-ALL | Gaborone, Botswana   | pigeon excreta                       | 2007 | $\alpha$    | VNI     | RSA1054, RTC9, RTE-ALL, Ug2471, In2629, Blg10, Br795, Tn10 (Belgium, Botswana, Brazil, India, Tanzania, RSA, Uganda)  | This study |
| Tu229-1 | Tuli block, Botswana | Mopane bark                          | 2007 | $\alpha$    | VNB     | Tu229-6, Tu236-1 (Botswana)                                                                                           | This study |
| Tu229-6 | Tuli block, Botswana | Mopane bark                          | 2007 | $\alpha$    | VNB     | Tu229-1, Tu236-1 (Botswana)                                                                                           | This study |
| Tu236-1 | Tuli block, Botswana | soil under Mopane tree               | 2007 | $\alpha$    | VNB     | Tu229-1, Tu229-6 (Botswana)                                                                                           | This study |
| Tu239-1 | Tuli block, Botswana | Mopane bark                          | 2007 | $\alpha$    | VNI     | Tu-239-2, Tu241-1, Tu241-2 (Botswana)                                                                                 | This study |
| Tu239-2 | Tuli block, Botswana | Mopane bark                          | 2007 | $\alpha$    | VNI     | Tu-239-1, Tu241-1, Tu241-2 (Botswana)                                                                                 | This study |
| Tu241-1 | Tuli block, Botswana | soil under Mopane tree               | 2007 | $\alpha$    | VNI     | Tu-239-1, Tu239-2, Tu241-2 (Botswana)                                                                                 | This study |



| Strain  | Geographic origin    | Source                    | Year | Mating type | VN type | Other strains with the same genotype                     | Reference  |
|---------|----------------------|---------------------------|------|-------------|---------|----------------------------------------------------------|------------|
|         |                      |                           |      |             |         | (countries where the genotype was isolated) <sup>a</sup> |            |
| Tu241-2 | Tuli block, Botswana | soil under<br>Mopane tree | 2007 | $\alpha$    | VNI     | Tu-239-1, Tu239-2, Tu241-1 (Botswana)                    | This study |
| Tu248-1 | Tuli block, Botswana | Baobab                    | 2007 | $\alpha$    | VNB     | Tu248-2 (Botswana)                                       | This study |
| Tu248-2 | Tuli block, Botswana | Baobab                    | 2007 | $\alpha$    | VNB     | Tu248-1 (Botswana)                                       | This study |
| Tu259-1 | Tuli block, Botswana | Mopane bark               | 2007 | $\alpha$    | VNI     | Tu259-2 (Botswana)                                       | This study |
| Tu259-2 | Tuli block, Botswana | Mopane bark               | 2007 | $\alpha$    | VNI     | Tu259-1 (Botswana)                                       | This study |
| Tu360-1 | Tuli block, Botswana | Mopane bark               | 2007 | $\alpha$    | VNB     | Tu360-2 (Botswana)                                       | This study |
| Tu360-2 | Tuli block, Botswana | Mopane bark               | 2007 | $\alpha$    | VNB     | Tu360-1 (Botswana)                                       | This study |
| Tu369-1 | Tuli block, Botswana | Mopane bark               | 2007 | $\alpha$    | VNB     | Tu369-2, Tu372-1, Tu372-2 (Botswana)                     | This study |
| Tu369-2 | Tuli block, Botswana | Mopane bark               | 2007 | $\alpha$    | VNB     | Tu369-1, Tu372-1, Tu372-2 (Botswana)                     | This study |
| Tu372-1 | Tuli block, Botswana | Mopane bark               | 2007 | $\alpha$    | VNB     | Tu369-1, Tu369-2, Tu372-1 (Botswana)                     | This study |
| Tu372-2 | Tuli block, Botswana | Mopane bark               | 2007 | $\alpha$    | VNB     | Tu369-1, Tu369-2, Tu372-2 (Botswana)                     | This study |
| Tu401-1 | Tuli block, Botswana | Mopane bark               | 2007 | $\alpha$    | VNB     |                                                          | This study |
| Tu406-1 | Tuli block, Botswana | Mopane bark               | 2007 | $\alpha$    | VNB     | Tu406-2 (Botswana)                                       | This study |
| Tu406-2 | Tuli block, Botswana | Mopane bark               | 2007 | $\alpha$    | VNB     | Tu406-2 (Botswana)                                       | This study |
| Tu416-1 | Tuli block, Botswana | Mopane bark               | 2007 | $\alpha$    | VNB     | Tu416-2 (Botswana)                                       | This study |
| Tu416-2 | Tuli block, Botswana | Mopane bark               | 2007 | $\alpha$    | VNB     | Tu416-1 (Botswana)                                       | This study |
| Tu422-1 | Tuli block, Botswana | Mopane bark               | 2007 | <b>a</b>    | VNB     | Tu422-2 (Botswana)                                       | This study |
| Tu422-2 | Tuli block, Botswana | Mopane bark               | 2007 | <b>a</b>    | VNB     | Tu422-2 (Botswana)                                       | This study |
| Ze90-1  | Zeerust, RSA         | Eucalyptus bark           | 2007 | $\alpha$    | VNB     | Ze90-2, Ze93-1, Ze93-2 (RSA)                             | This study |

| Strain | Geographic origin | Source                        | Year | Mating type | VN type | Other strains with the same genotype (countries where the genotype was isolated) <sup>a</sup> | Reference  |
|--------|-------------------|-------------------------------|------|-------------|---------|-----------------------------------------------------------------------------------------------|------------|
| Ze90-2 | Zeerust, RSA      | Eucalyptus bark               | 2007 | $\alpha$    | VNB     | Ze90-1, Ze93-1, Ze93-2 (RSA)                                                                  | This study |
| Ze93-1 | Zeerust, RSA      | soil under<br>Eucalyptus tree | 2007 | $\alpha$    | VNB     | Ze90-1, Ze90-2, Ze93-2 (RSA)                                                                  | This study |
| Ze93-2 | Zeerust, RSA      | soil under<br>Eucalyptus tree | 2007 | $\alpha$    | VNB     | Ze90-1, Ze90-2, Ze93-1 (RSA)                                                                  | This study |

<sup>a</sup> Other strains with the same genotype. Because of space considerations, only representative strains are included. A complete list of each global strain and its origin is provided in ref. 10 and 38.

<sup>b</sup> CSF, cerebrospinal fluid.

<sup>c</sup> HIV+, HIV-infected; HIV-, non-HIV-infected.

<sup>d</sup> RSA, Republic of South Africa; DRC, Democratic Republic of the Congo, Pr., Province.
